# Supplementary material for: A Questionnaire-Based Assessment of Functional Dry Eye Disease in Working-class Population in Shanghai, China
Source: Research Square preprint supplement (doi:10.21203/rs.3.rs-380033/v1), 2021-04-03
Supplement: Supplementary file 1 [file 6eb8159a0b72db15cb11baa1.docx]

**Questionaire**

1. **Your age (year)**

<20 21-30 31-40 41-50 <51

1. **Your gender**

Male Female

1. **Your profession**

IT practitioner Office staff Financial staff Teacher/researcher Computer design Consultant Others

**4. Your education background**

Junior high school or below senior high school (technical secondary school) University (junior college) Graduate

**5. Do you often work overtime?**

Yes No

**6. If yes, how many hours per day?**

Less than 1 hour 1-2 hours 2-3 hours more than 3 hours

**7. What are the main visual devices you use in your daily work?**

Mobile Computer TV e-book 3 kinds or more

**8. How many hours do you work in front of the computer per day?**

Less than 4 hours 4-6 hours 6-8 hours more than 8 hours

**9. How many hours do you use your mobile phone on average per day?**

Less than 4 hours 4-6 hours 6-8 hours more than 8 hours

**10. How many hours do you watch TV per day?**

Less than 1 hour 1-3 hours 3-6 hours more than 6 hours

**11. When do you usually get up in the morning?**

Before 6:00 6:00-7:00 7:00-8:00 After 8:00

**12. When do you usually sleep in the evening?**

Before 9:00 9:00-11:00 11:00-12:00 After 12:00

**13. How many hours do you sleep deeply at night?**

Less than 5 hours 5-6 hours 6-7 hours 7-8 hours more than 8 hours

**14. How many days do you sleep after 12 o'clock per week?**

Less than 1 day 1-2 days 3-5 days 6 days or more

**15. Do you feel pressure at work?**

Yes No

**16. Do you often feel anxious?**

Yes No

**17. How long do you stay under air-conditioner per day?**

Less than 3 hours 3-5 hours 5-8 hours more than 8 hours

**18. Is your work or life place newly decorated (within 1 year)?**

Yes No

**19. If yes, do you feel itchy, red and swollen eyes and tears?**

Yes No

**20. Do you often exercise?**

Yes No

**21. If yes, how many times do you exercise per week?**

1-2 times 3-4 times 5 times or more

**22. What's your average exercise time?**

Less than half an hour 0.5 - 1 hour 1-2 hours 2-3 hours more than 3 hours

**23. Do you smoke?**

Yes No

**24. If yes, how many cigarettes per day?**

Less than 5 5-10 10-20 more than 20

**25. Do you drink?**

Yes No

**26. If yes, how many times do you drink per week?**

1-2 3-4 5 times or more

**27. Do you wear contact lenses?**

Yes No

**28. If yes, how many times do you wear per week?**

1-2 times 3-4 times more than 5 times

**29. What types of contact lenses do you wear?**

Daily type monthly type Quarterly type half year type yearly type

**30．Water content of your contact lens**

High water content medium water content low water content

**31. Do you take out your contact lenses before sleep?**

Yes No
